# Supplementary material for: A natural hyperoside based novel light-up fluorescent probe with AIE and ESIPT characteristics for on-site and long-term imaging of β-galactosidase in living cells
Source: Royal Society of Chemistry journal article supplement (doi:10.1039/d0tc01981j), 2020-01-01
Supplement: d0tc01981j1.pdf [file d0tc01981j1.pdf]

Electronic Supplementary Information

**Natural hyperoside based novel light-up fluorescent probe with AIE and ESIPT characteristics for on-site and long-term imaging of  $\beta$ -galactosidase in living cells**

Ruiqing Long,<sup>a,‡</sup> Cui Tang,<sup>b,‡</sup> Zan Yang,<sup>c</sup> Qiachi Fu,<sup>a</sup> Jinju Xu,<sup>a</sup> Chaoying Tong,<sup>a</sup>  
Shuyun Shi,<sup>a,d,\*</sup> Ying Guo,<sup>b,\*</sup> and Daijie Wang<sup>d</sup>

<sup>a</sup>Key Laboratory of Hunan Province for Water Environment and Agriculture Product Safety, College of Chemistry and Chemical Engineering, Central South University, Changsha 410083, China. E-mail: shuyshi@gmail.com

<sup>b</sup>Department of Clinical Pharmacology, Xiangya Hospital; Hunan Key Laboratory of Pharmacogenetics, Central South University, 410078 Changsha, China. E-mail: guoying881212@csu.edu.cn

<sup>c</sup>College of Chemistry and Chemical Engineering, Hunan Institute of Science and Technology, Yueyang 414006, China.

<sup>d</sup>Key Laboratory of TCM Quality Control, Shandong Analysis and Test Center, Qilu University of Technology (Shandong Academy of Sciences), Jinan 250014, China

<sup>‡</sup>Ruiqing Long and Cui Tang contributed equally to this work.

## 1. Experimental section

### 1.1. Materials

Cysteine (Cys), homocysteine (Hcy), glutathione (GSH), tetrahydrofuran (THF), methylthiazolyldiphenyl-tetrazolium bromide (MTT), quercetin, dimethylsulfoxide (DMSO), chloroform, and methanol were supported by Aladdin Reagent Co., Ltd. (Shanghai, China).  $\beta$ -Glucosidase ( $\beta$ -Glu), glucose oxidase (GOD),  $\beta$ -galactosidase ( $\beta$ -Gal, 3.2.1.23), D-galactose, Golgi-Tracker Green, Lyso-Tracker Green, Mito-Tracker Green, and indocyanine green (ICG) were purchased from Macklin Reagent Co., Ltd. (Shanghai, China). All chemicals and reagents were of analytical grade without additional purification. The Milli-Q water purification system (Millipore, Bedford, MA, USA) provided ultrapure water (18.2 M  $\Omega$ •cm).

### 1.2. Instruments

$^1\text{H}$ -NMR and  $^{13}\text{C}$ -NMR spectrum were obtained using Bruker spectrometer with chemical shifts reported in ppm and coupling constants ( $J$ ) reported in Hz. High resolution mass spectra (HRMS) were recorded on Bruker compact QTOF-MS with an electrospray ionization (ESI) interface (Bruker Co., Bremen, Germany). TEM images were obtained using Tecnai G2 20S-Twin transmission electron microscope (TEM, FEI, Prague, Czech). Dynamic light scattering (DLS) measurements were carried out with a ZetaSizer Nano ZS type Zeta potential meter (Malvern Instrument Company, England). UV-vis spectra were measured with UV-2600 spectrophotometer (Shimadzu, Japan). The fluorescence measurements were carried out on a Perkin-Elmer LS-55 luminescence spectrometer (PerkinElmer, USA). Fluorescence lifetime measurements were carried out on Fluo Time 100 (PicoQuant, Germany). pH value was controlled using Five Easy plus pH Meter (Mettler Toledo, China). Cell imaging was studied by Snap cool HQ<sup>2</sup> imaging system (Photometrics Inc., USA).

### 1.3. Preparative isolation of hyperoside from *Hedyotis diffusa*

Dried *Hedyotis diffusa* was bought from local drugstore, Hunan, China, which was identified by Prof. Shuihan Zhang, Research Institute of Chinese Medicine, Hunan Academy of Chinese Medicine, Changsha, China. After that, *Hedyotis diffusa* was ground and sieved, and materials between 180 and 250  $\mu\text{m}$  was used for extraction. *Hedyotis diffusa* powder (50.0 g) was extracted with 60% ethanol (800 mL, three times) at 85 °C (each for 3 h). After filtration, the extract was combined and evaporated to dryness, which was then chromatographed on repeated silica gel columns using chloroform–methanol (1:0–0:1) as solvent systems to afford 32.7 mg of hyperoside.

Hyperoside,  $^1\text{H}$  NMR (400 MHz,  $\text{DMSO-}d_6$ )  $\delta$  12.64 (s, 1H, 5-OH), 10.87 (s, 1H, 7-OH), 9.74 (s, 1H, 4'-OH), 9.16 (s, 1H, 3'-OH), 7.67 (dd,  $J = 8.5, 2.2$  Hz, 1H, H-6'), 7.53 (d,  $J = 2.2$  Hz, 1H, H-2'), 6.82 (d,  $J = 8.5$  Hz, 1H, H-5'), 6.41 (d,  $J = 2.0$  Hz, 1H, H-8), 6.20 (d,  $J = 2.0$  Hz, 1H, H-6), 5.38 (d,  $J = 7.7$  Hz, 1H, H-1''), 5.14 (d,  $J = 4.5$  Hz, 1H, Glc-OH), 4.86 (d,  $J = 5.3$  Hz, 1H, Glc-OH), 4.44 (d,  $J = 12.1, 4.9$  Hz, 1H, Glc-OH), 4.43 (d,  $J = 4.9$  Hz, 1H, Glc-OH), 3.65 (s, 1H, H-4''), 3.58 (m, 1H, H-2''), 3.45 (dd,  $J = 9.9, 5.6$  Hz, 1H, H-6''a), 3.38 (d,  $J = 4.5$  Hz, 1H, H-3''), 3.33-3.26 (m, 2H, H-5'' and H-6''b);  $^{13}\text{C}$  NMR (100 MHz,  $\text{DMSO-}d_6$ )  $\delta$  178.0 (C-4), 164.6 (C-7), 161.7 (C-5), 156.8 (C-9), 156.7 (C-2), 148.9 (C-4'), 145.3 (C-3'), 133.9 (C-3), 122.5 (C-6'), 121.55 (C-1'), 116.4 (C-2'), 115.6 (C-5'), 104.4 (C-10), 102.2 (C-1''), 99.1 (C-6), 94.0 (C-8), 76.3 (C-5''), 73.6 (C-3''), 71.7 (C-2''), 68.4 (C-4''), 60.6 (C-6'').

### 1.4. Computation Methods

Time-dependent density functional theory (TD-DFT) calculations were used for the theoretical investigation of ESIPT mechanism. Local minima and transition state structures were obtained by optimization of geometry. Geometries were determined with the B3LYP/6-31+G (d) basis set, while energies were determined by single point

calculations with the B3LYP/6-311+G (d,p) basis set upon optimized structures. All calculations were performed using Gauss 9.0 package.

#### 1.5. Responses of hyperoside to $\beta$ -Gal

Hyperoside (100.0  $\mu$ g) is dissolved in THF/PBS solution (20/80, v/v, pH 7.4, 50 mM, 12.5 mL). After that, mixtures were sonicated for 2 h at 25 °C and placed in a fume hood to volatilize all THF for preparation of hyperoside solution. Then, different concentrations of  $\beta$ -Gal in PBS solution (pH 7.4, 30  $\mu$ L) were mixed with hyperoside solution (3.0 mL), and final concentrations of  $\beta$ -Gal were from 0 to 14 U mL<sup>-1</sup>. Mixtures were incubated at 37 °C for 70 min, and then UV spectra and FL spectra were measured. The excitation wavelength, excitation and emission slits were set at 360, 5, and 20 nm, respectively.

#### 1.6. Cytotoxicity and cellular imaging investigation

HeLa and SKOV-3 cells were supported by Xiangya Hospital of Central South University. Cytotoxicity experiments of hyperoside and quercetin were evaluated using MTT assay. SKOV-3 cells and Hela cells were seeded in 96-well plate with the density of  $1 \times 10^4$  cells per each well and attached for 24 h in cell culture medium at 5 % CO<sub>2</sub> atmosphere. Then, cells were treated with hyperoside or quercetin with different concentrations (0–1.0 mg mL<sup>-1</sup>), and cultured for another 24 h at 5 % CO<sub>2</sub> atmosphere. Freshly prepared MTT (150  $\mu$ L, 0.5 mg mL<sup>-1</sup>) was added to each well to form the violet formazan for 4 h. Supernatant was removed and DMSO (150  $\mu$ L) was added and shaken for 15 min to dissolve the violet formazan. Control experiments were performed under the same conditions without the addition of hyperoside or quercetin. Optical density (OD) of each well was measured using Enzyme Linked Immunosorbent Assay reader at 490 nm. Cell viability was calculated as following: cell viability (%) =  $(OD_{\text{treated}}/OD_{\text{control}}) \times 100\%$ , where OD<sub>treated</sub> and OD<sub>control</sub> were obtained with and

without treatment with hyperoside or quercetin.

For cellular imaging, SKOV-3 cells were seeded in 6-well plate with density of  $7 \times 10^4$  cells per well and attached for 24 h in cell culture medium at 5% CO<sub>2</sub> atmosphere. Then, SKOV-3 cells were treated with hyperoside (100  $\mu\text{g mL}^{-1}$  in culture medium, 1.5 mL) at 37°C for 2h. Another group of SKOV-3 cells was preincubated with D-galactose solution (1.0 mM, 1.5 mL) at 37°C for 0.5 h. After that, medium was removed and SKOV-3 cells were treated with hyperoside (100  $\mu\text{g mL}^{-1}$  in culture medium, 1.5 mL) at 37°C for 2h. HeLa cells were pretreated with  $\beta$ -Gal solution (12 U mL<sup>-1</sup> in culture medium, 1.5 mL) at 37°C for 2h for the exogenous  $\beta$ -Gal group. After removal of culture medium, HeLa cells were incubated with hyperoside (100  $\mu\text{g mL}^{-1}$  in culture medium, 1.5 mL) at 37°C for 2h. Finally, all cells were imaged by confocal laser scanning microscope.

For colocalization imaging, SKOV-3 cells were seeded in 6-well plate with the density of  $7 \times 10^4$  cells per well and attached for 24 h in cell culture medium at 5 % CO<sub>2</sub> atmosphere. SKOV-3 cells were incubated with hyperoside (100  $\mu\text{g mL}^{-1}$  in culture medium, 1.5 mL) at 37°C for 2 h, and then co-stained with Golgi-Tracker Green (0.3 mg mL<sup>-1</sup>) for 30 min, Mito-Tracker Green (200 nM) for 30 min, or Lyso-Tracker Green (75 nM) for 60 min. Finally, SKOV-3 cells were imaged by confocal laser scanning microscope.

For long-term imaging, SKOV-3 cells were seeded in 6-well plate with the density of  $7 \times 10^4$  cells per well and attached for 24 h in cell culture medium at 5% CO<sub>2</sub> atmosphere. Then SKOV-3 cells were incubated with hyperoside (100  $\mu\text{g mL}^{-1}$  in culture medium, 1.5 mL), and imaged by confocal laser scanning microscope at different time intervals (0.5–24 h).

## 2. Supplementary Fig. S1-S15

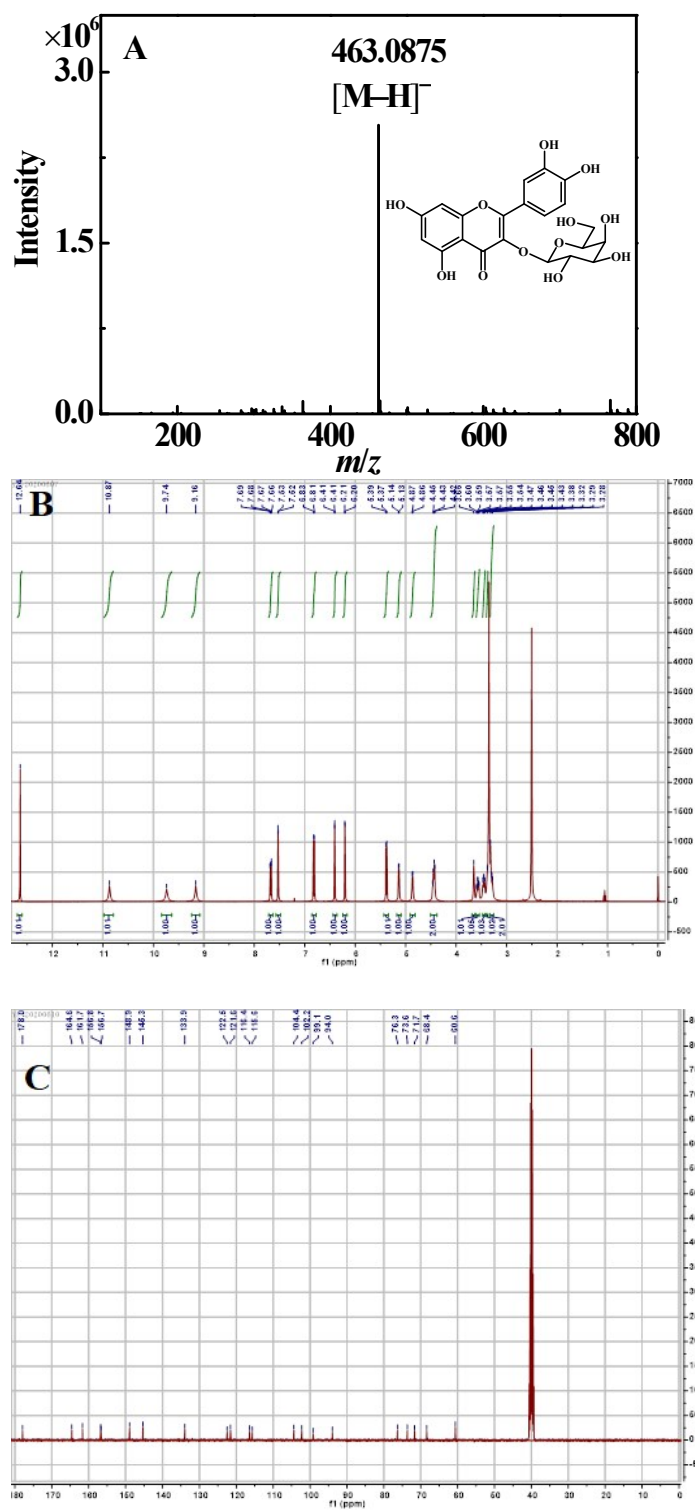

**Fig. S1** High-resolution MS (A),  $^1\text{H}$  NMR (B) and  $^{13}\text{C}$  NMR (C) spectra of purified hyperoside.

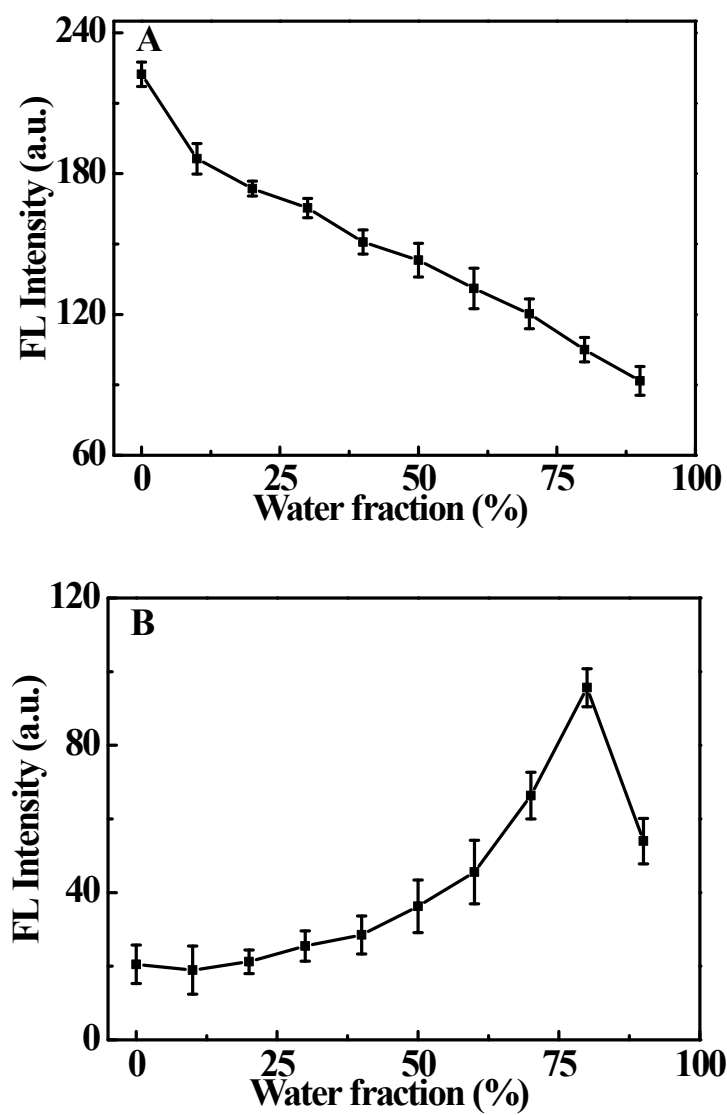

**Fig. S2** FL intensities at 405 nm of hyperoside (10  $\mu\text{g mL}^{-1}$ ) (A) and at 530 nm of quercetin (10  $\mu\text{g mL}^{-1}$ ) (B) in THF with different water fractions.

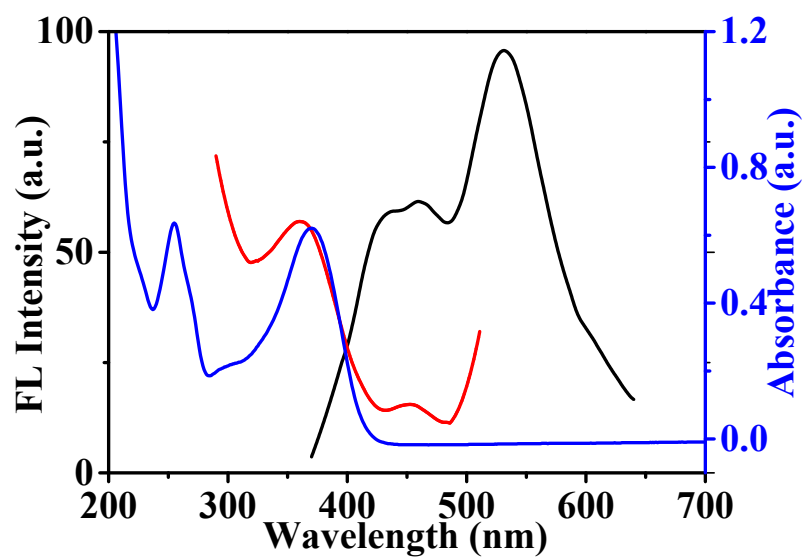

**Fig. S3** Emission (black line), excitation (red line) and UV-vis (blue line) spectra of quercetin in THF/H<sub>2</sub>O (20/80, v/v).



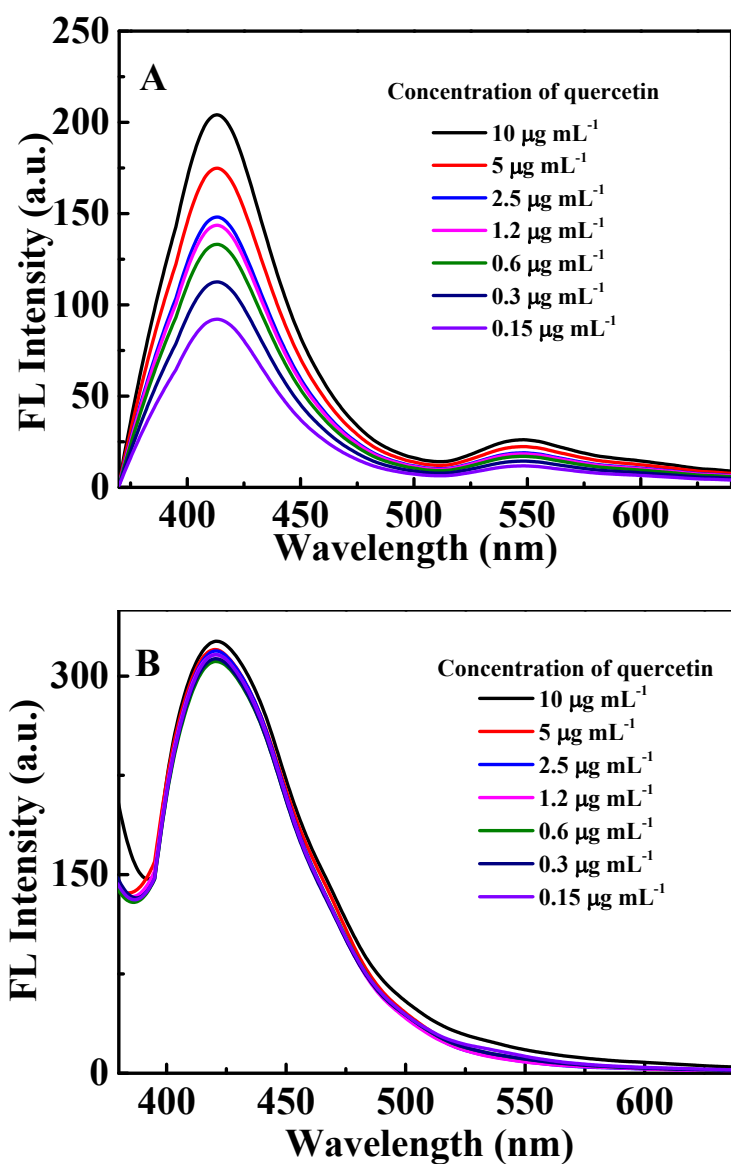

Fig. S4 FL spectra of quercetin in THF (A) and DCM (B) solutions.

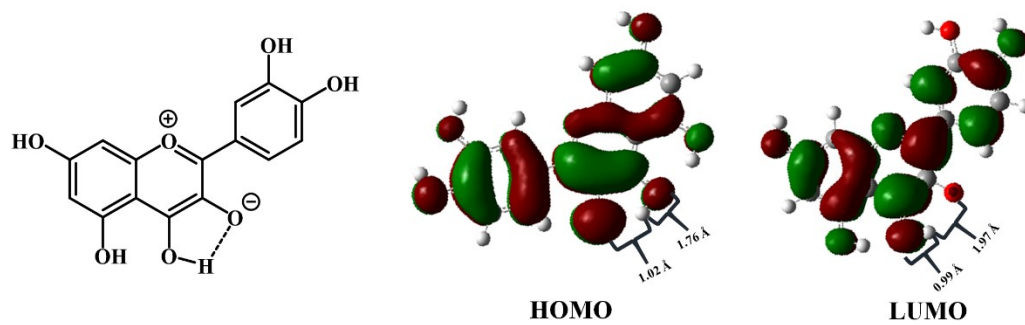

**Fig. S5** HOMO (ground state) and LUMO (excited state) molecular orbitals of keto form of quercetin calculated with TDDFT at the level of B3LYP/6-31G\* in THF solution.

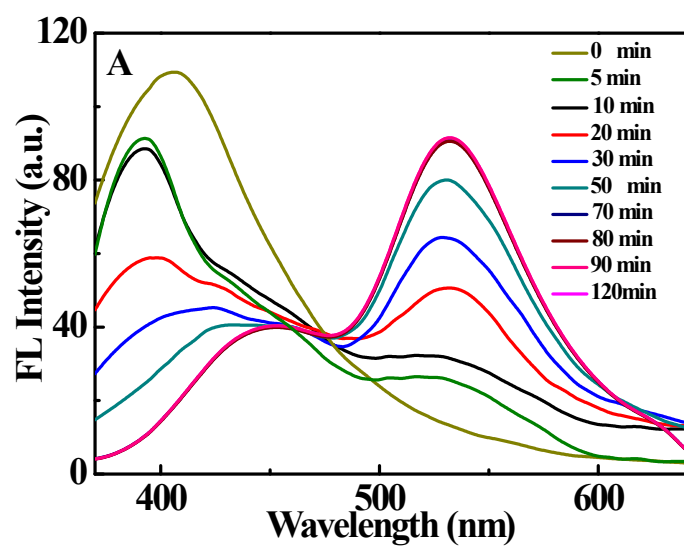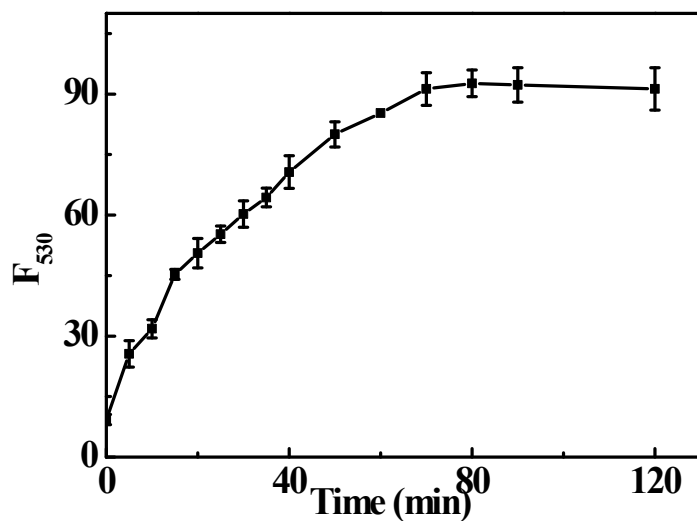

**Fig. S6** FL spectra of hyperoside ( $10 \mu\text{g mL}^{-1}$ ) after addition of  $\beta$ -Gal ( $12 \text{ U mL}^{-1}$ ) with different incubation time (A); FL intensity at 530 nm ( $F_{530}$ ) for hyperoside after addition of  $\beta$ -Gal ( $12 \text{ U mL}^{-1}$ ) with different incubation time (B).

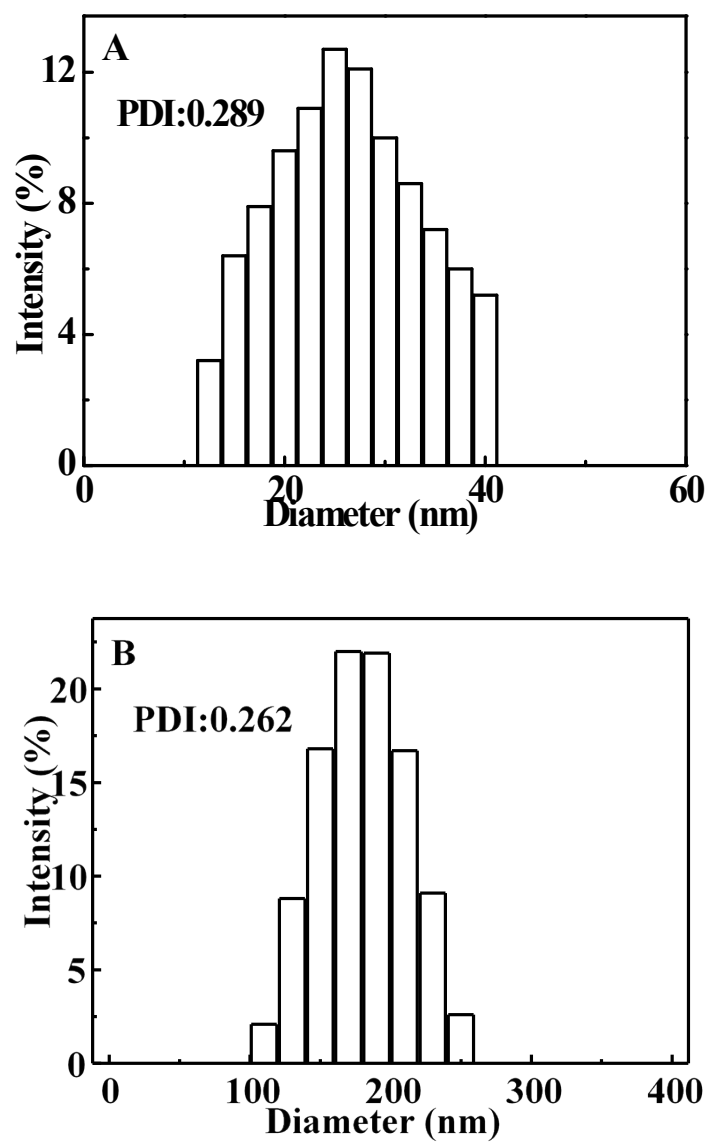

**Fig. S7** DLS of hyperoside (10  $\mu\text{g mL}^{-1}$ ) before and after incubation with  $\beta$ -Gal (12 U  $\text{mL}^{-1}$ ).

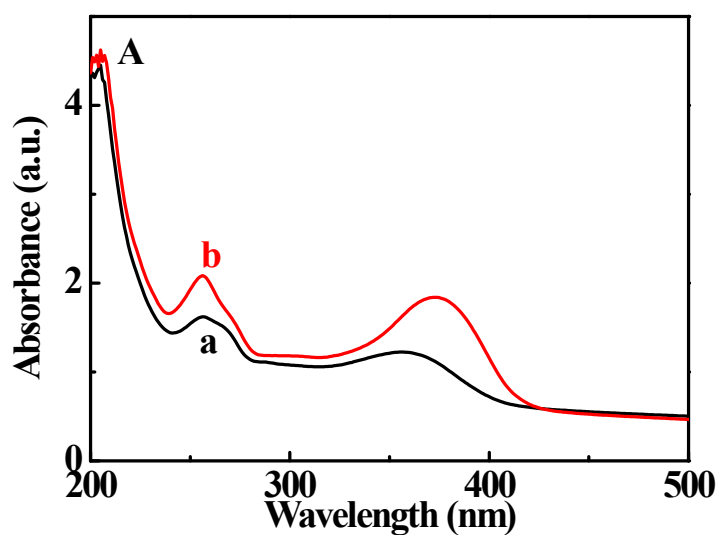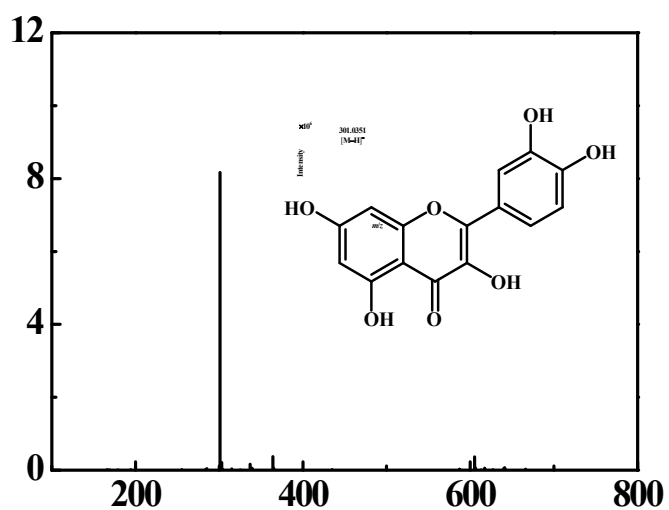

**Fig. S8** UV-vis spectra of hyperoside ( $10 \mu\text{g mL}^{-1}$ ) before (a) and after (b) addition of  $\beta\text{-Gal}$  (A); MS spectrum of the product of hyperoside after addition of  $\beta\text{-Gal}$  ( $12 \text{ U mL}^{-1}$ ) (B).

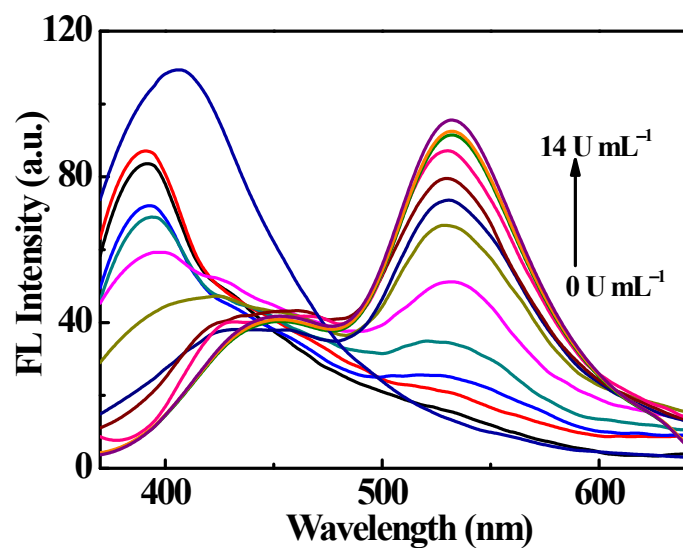

**Fig. S9** FL spectra of hyperoside ( $10 \mu\text{g mL}^{-1}$ ) after incubation with different concentrations of  $\beta$ -Gal ( $0\text{--}14 \text{ U mL}^{-1}$ ).

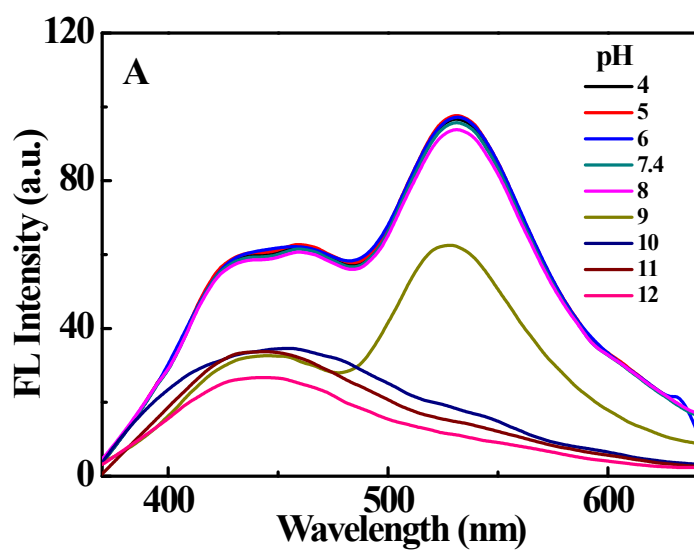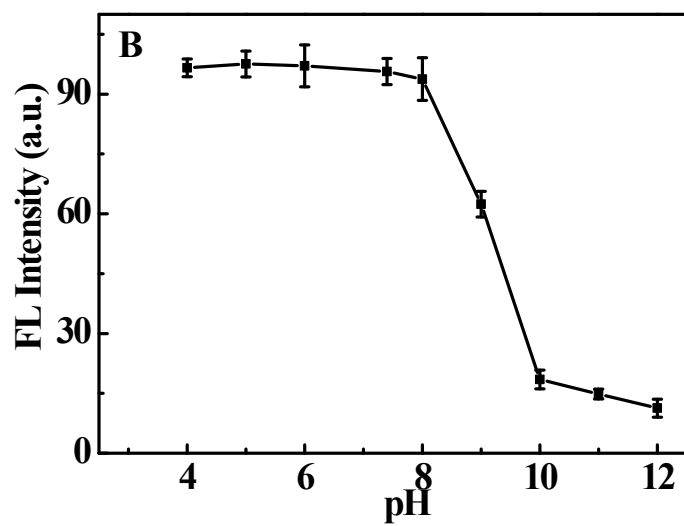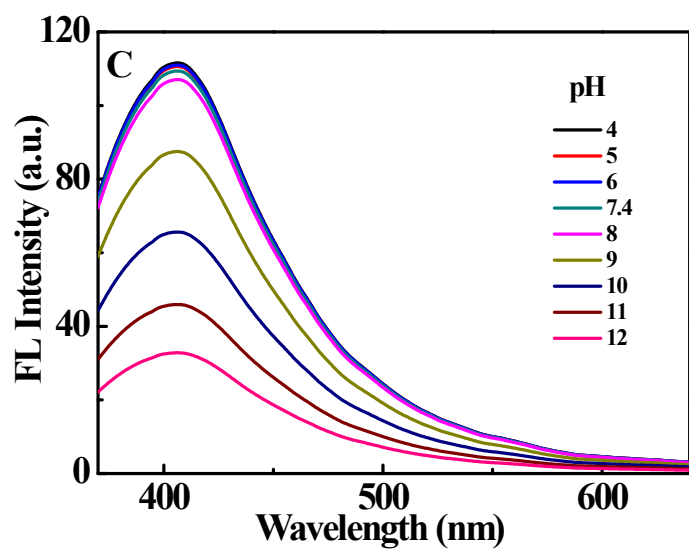

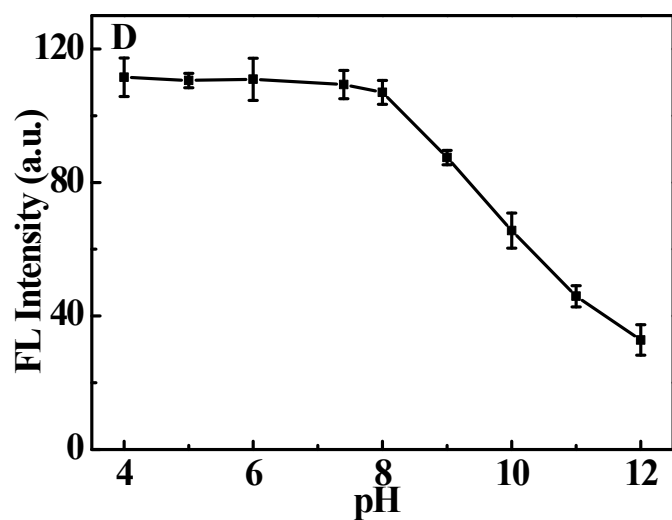

**Fig. S10** FL spectra of quercetin ( $10 \mu\text{g mL}^{-1}$ ) (A) and hyperoside ( $10 \mu\text{g mL}^{-1}$ ) (C) at pH 4–12; FL intensity at 530 nm for quercetin (B) and FL intensity at 405 nm for hyperoside (D) at pH 4–12.



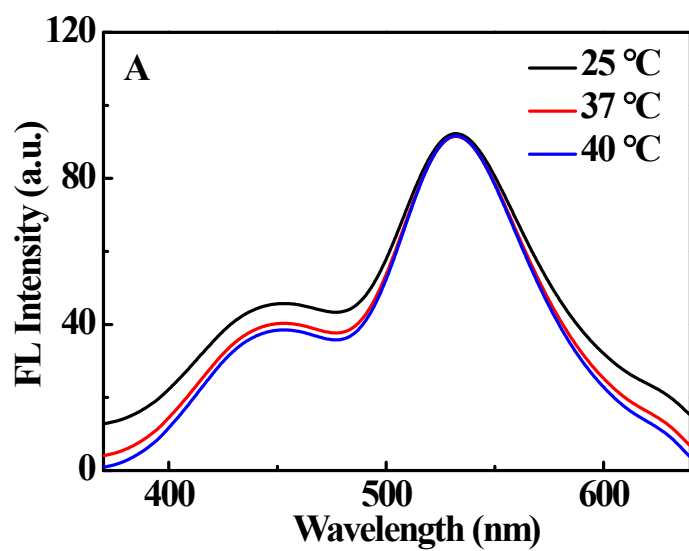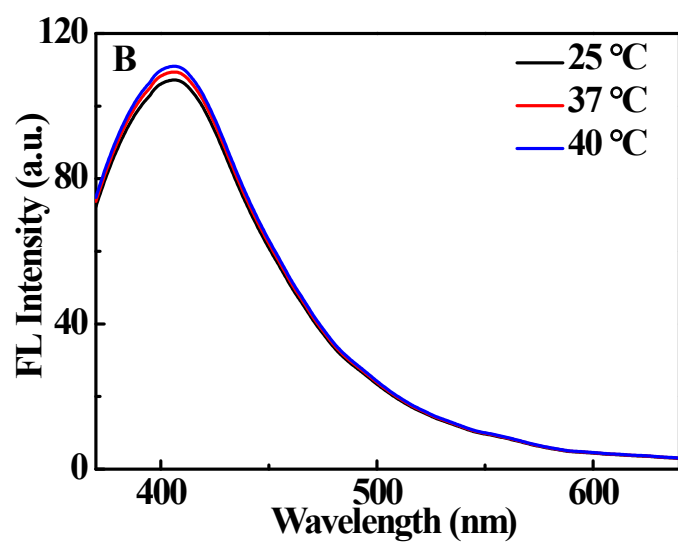

**Fig. S11** FL spectra of quercetin ( $10 \mu\text{g mL}^{-1}$ ) (A) and hyperoside ( $10 \mu\text{g mL}^{-1}$ ) (B) at 25 °C, 37 °C and 40 °C.

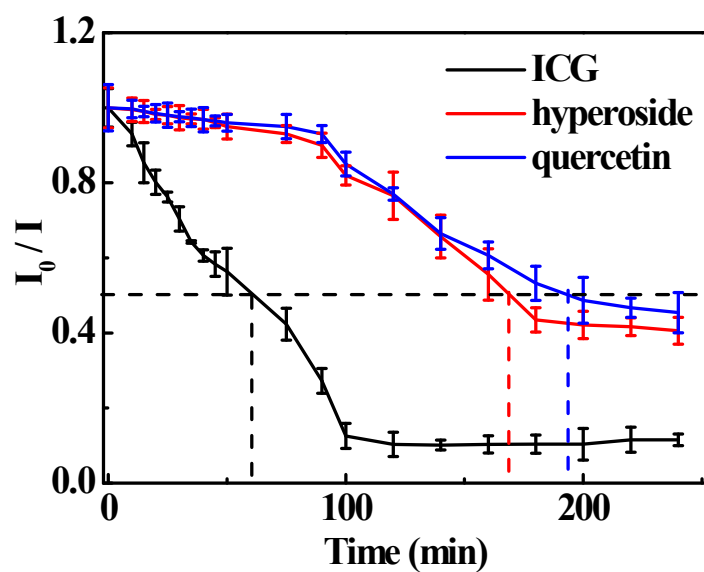

**Fig. S12** Time-dependent fluorescence intensity of ICG ( $10 \mu\text{g mL}^{-1}$ ,  $E_{\text{ex}}$  at 780 nm,  $E_{\text{m}}$  at 812 nm), hyperoside ( $10 \mu\text{g mL}^{-1}$ ,  $E_{\text{ex}}$  360 nm,  $E_{\text{m}}$  at 405 nm), and quercetin ( $10 \mu\text{g mL}^{-1}$ ,  $E_{\text{ex}}$  360 nm,  $E_{\text{m}}$  at 530 nm) under sustained UV irradiation.

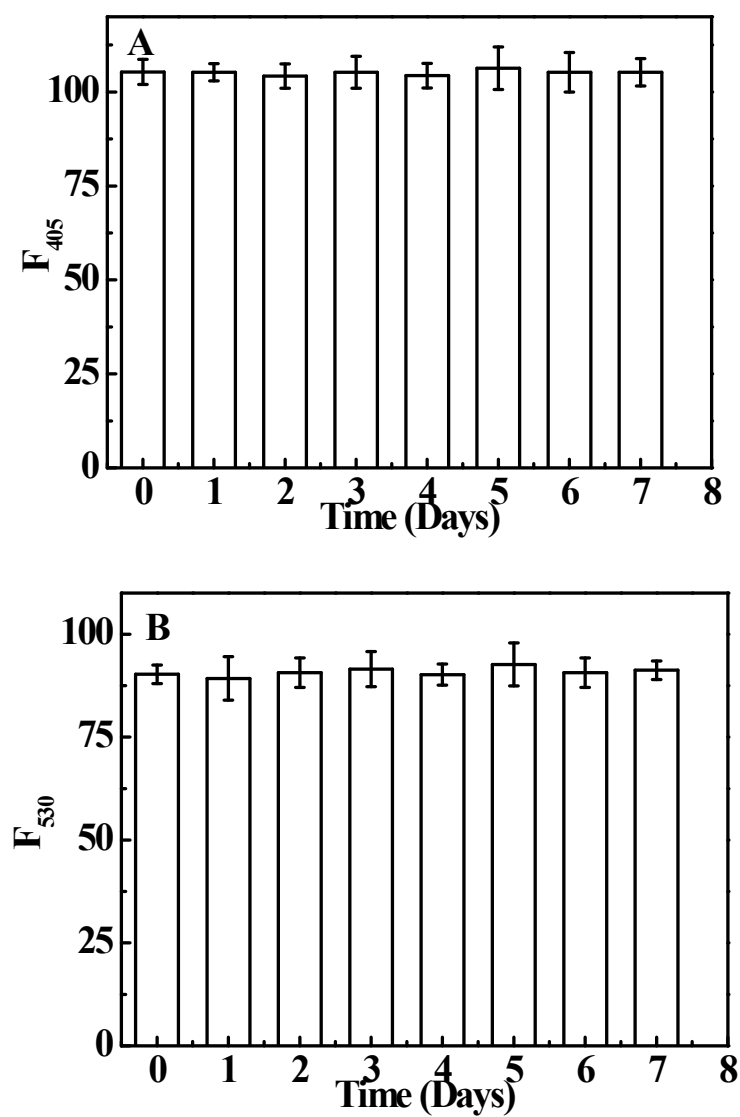

**Fig. S13** FL intensity at 405 nm ( $F_{405}$ ) of hyperoside (10  $\mu\text{g mL}^{-1}$ ) (A) and FL intensity at 530 nm ( $F_{530}$ ) of quercetin (10  $\mu\text{g mL}^{-1}$ ) (B) in human serum for one week.

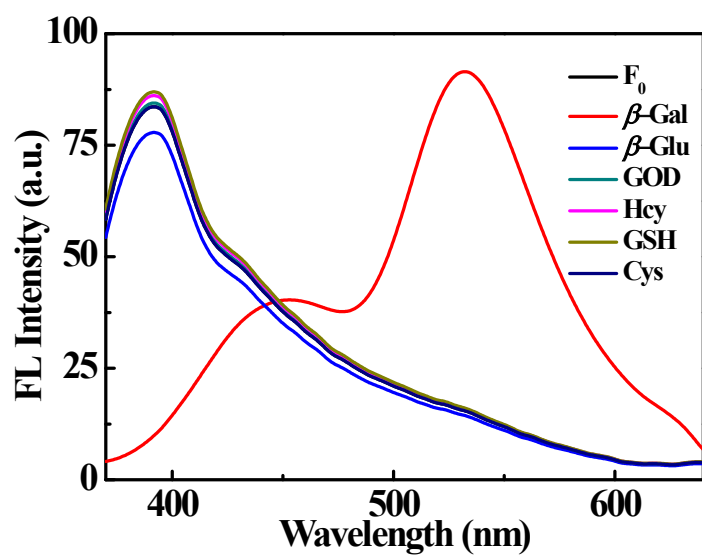

**Fig. S14** FL spectra of hyperoside (10  $\mu\text{g mL}^{-1}$ ) after incubation with  $\beta$ -Gal (12 U  $\text{mL}^{-1}$ ) and various other analytes (100 equiv.).

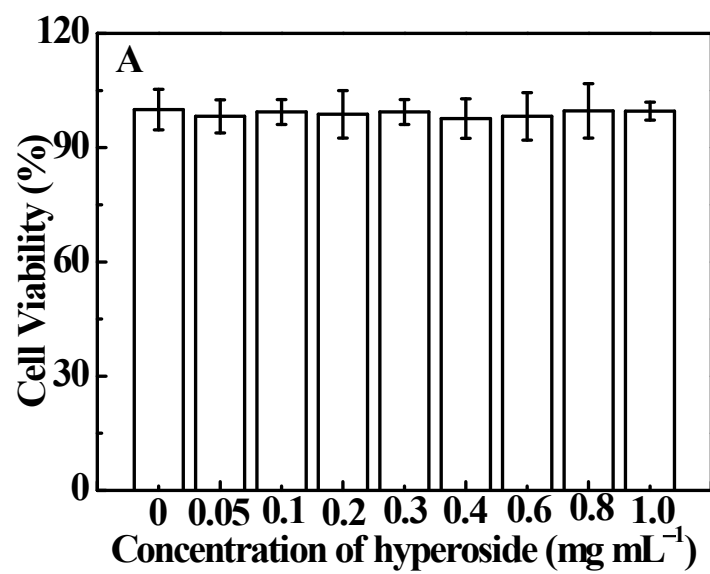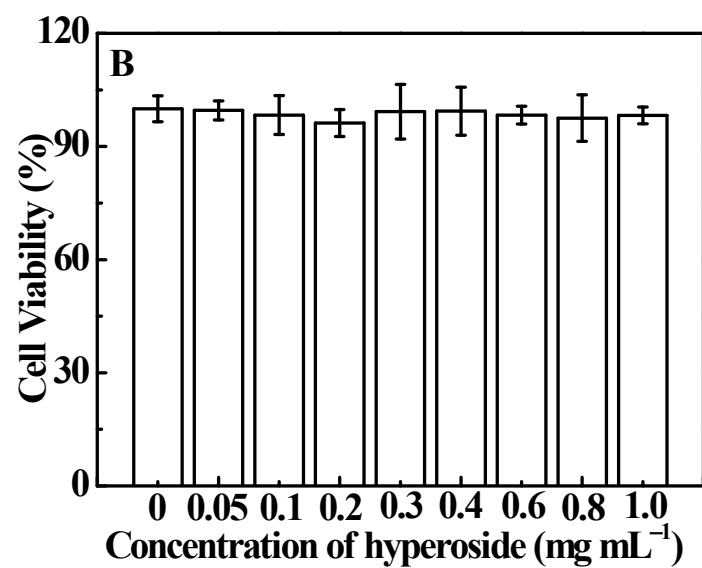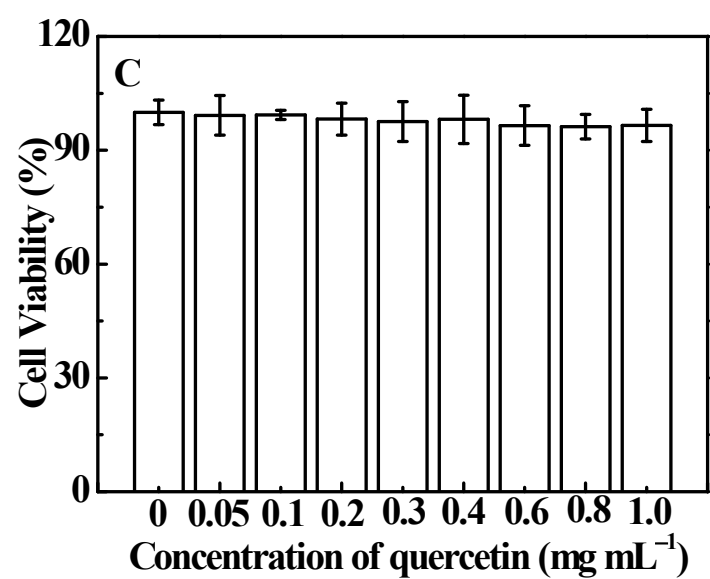

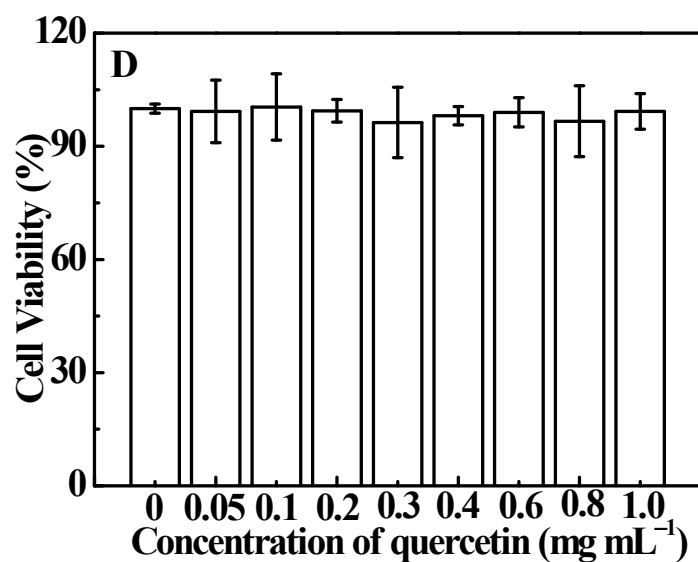

**Fig. S15** Cell viabilities of HeLa (A) and SKOV-3 (B) cells treated with different concentrations of hyperoside; Cell viabilities of HeLa (C) and SKOV-3 (D) cells treated with different concentrations of quercetin.
